# Supplementary material
Source: PubMed Central journal article supplement (PMC9624231)
Supplement: NIHMS1843634-supplement-Table_S1.pdf [file NIHMS1843634-supplement-Table_S1.pdf]

**Supplementary Table 1 – Serology, culture, and PCR analysis of Pet Shop mice**

| <b>Serology</b>                        | <b>Number of positive mice</b> |
|----------------------------------------|--------------------------------|
| Mouse Hepatitis Virus                  | 4/9                            |
| Sendai Virus                           | 0/9                            |
| Pneumonia Virus of Mice                | 6/9                            |
| Mouse Parvovirus                       | 7/9                            |
| Minute Virus of Mice                   | 5/9                            |
| Mycoplasma pulmonis                    | 7/9                            |
| Clostridium Piliforme                  | 0/9                            |
| Theilers Murine Encepholomyelitis      | 5/9                            |
| Ectromelia Virus                       | 0/9                            |
| Rotavirus                              | 0/9                            |
| Mouse Adenovirus 1 and 2               | 3/9                            |
| Lymphocytic Choriomeningitis Virus     | 0/9                            |
| Encephalitozoon cuniculi               | 0/9                            |
| CAR bacillus                           | 1/2                            |
| Hantaan Virus                          | 0/2                            |
| Reovirus                               | 0/9                            |
| Mouse Cytomegalo Virus                 | 0/2                            |
| Mouse Thymic Virus                     | 0/2                            |
| Polyoma Virus                          | 0/2                            |
| Murine Norovirus                       | 0/9                            |
| Lactate Dehydrogenase Elevating Virus  | 0/2                            |
| <b>Parasitology</b>                    |                                |
| Fur mite Myobia musculi                | 2/2                            |
| Pinworm Syphacia Sp                    | 2/2                            |
| Pinworm Aspicularis tetraptera         | 1/2                            |
| Protozoa tritrichomonas muris          | 2/2                            |
| Protozoa Giardia muris                 | 2/2                            |
| <b>Culture</b>                         |                                |
| Nasopharynx (Streptococcus viridans)   | 2/2                            |
| Cecocolic (Proteus miribalis, E. coli) | 2/2                            |
| <b>PCR</b>                             |                                |
| Cecum (Helicobacter rodentium)         | 2/2                            |
| MLN (Parvovirus)                       | 2/2                            |
